# Supplementary material for: Hybrid materials consisting of an all-conjugated polythiophene backbone and grafted hydrophilic poly(ethylene glycol) chains
Source: Royal Society of Chemistry journal article supplement (doi:10.1039/c3py00029j), 2013-01-01
Supplement: c3py00029j.pdf [file c3py00029j.pdf]

# **Electronic Supplementary Information**

**Hybrid materials consisting of all-conjugated  
polythiophene backbone and grafted hydrophilic  
poly(ethylene glycol) chains**

**Anca-Dana Bendrea, Georgina Fabregat, Luminita Cianga, Francesc  
Estrany, Luis J. del Valle, Ioan Cianga, and Carlos Alemán**

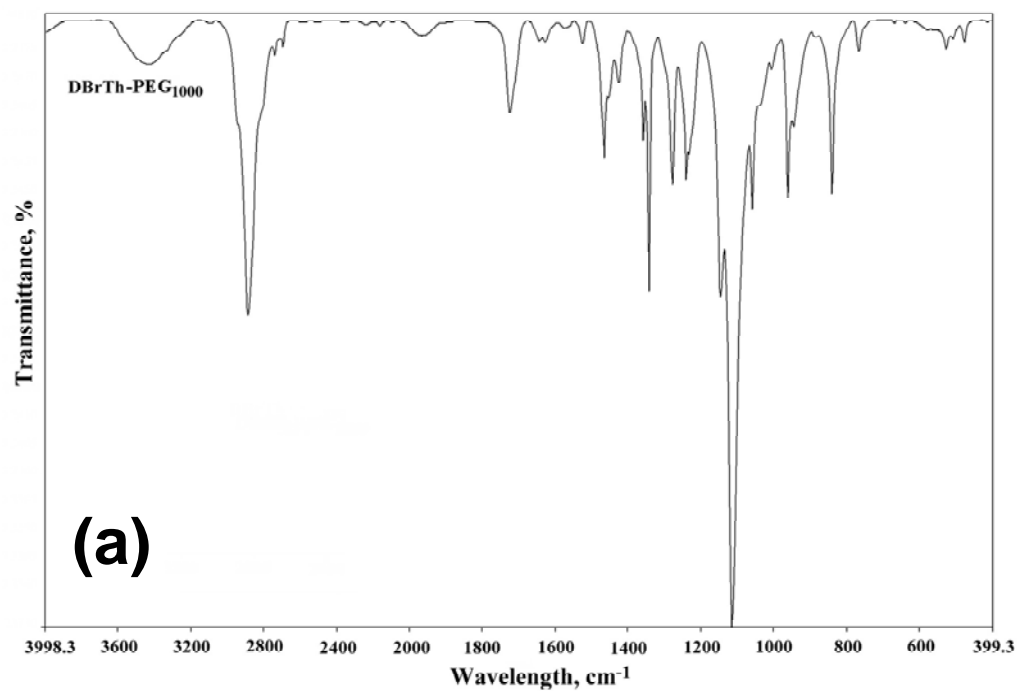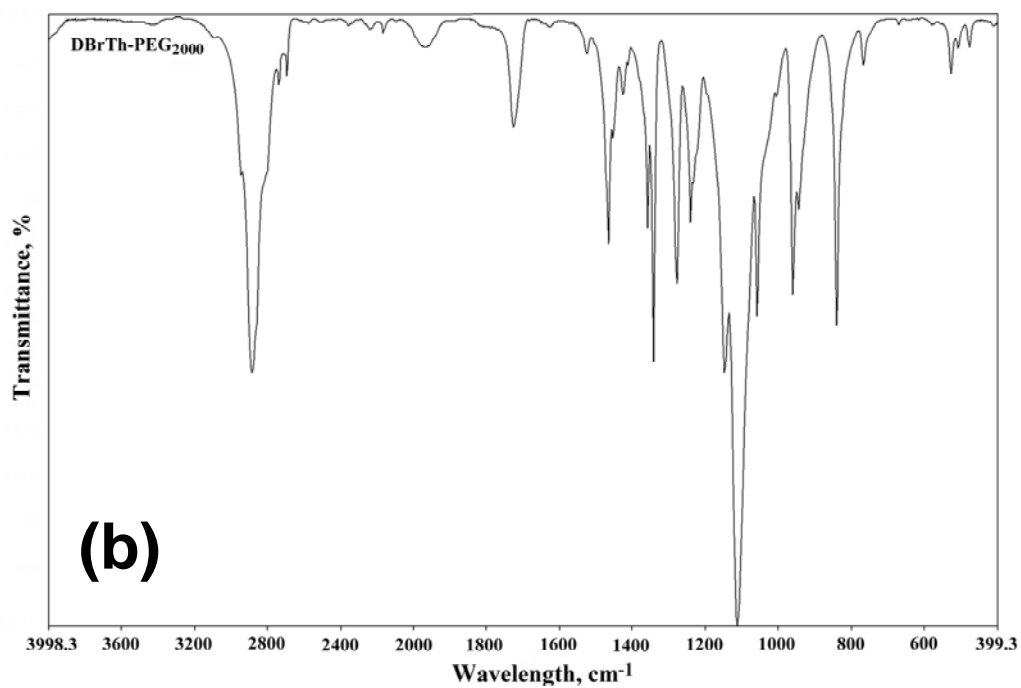

**Figure S1.** FTIR spectra of: (a) DBrTh-PEG<sub>1000</sub>; and (b) DBrTh-PEG<sub>2000</sub>.

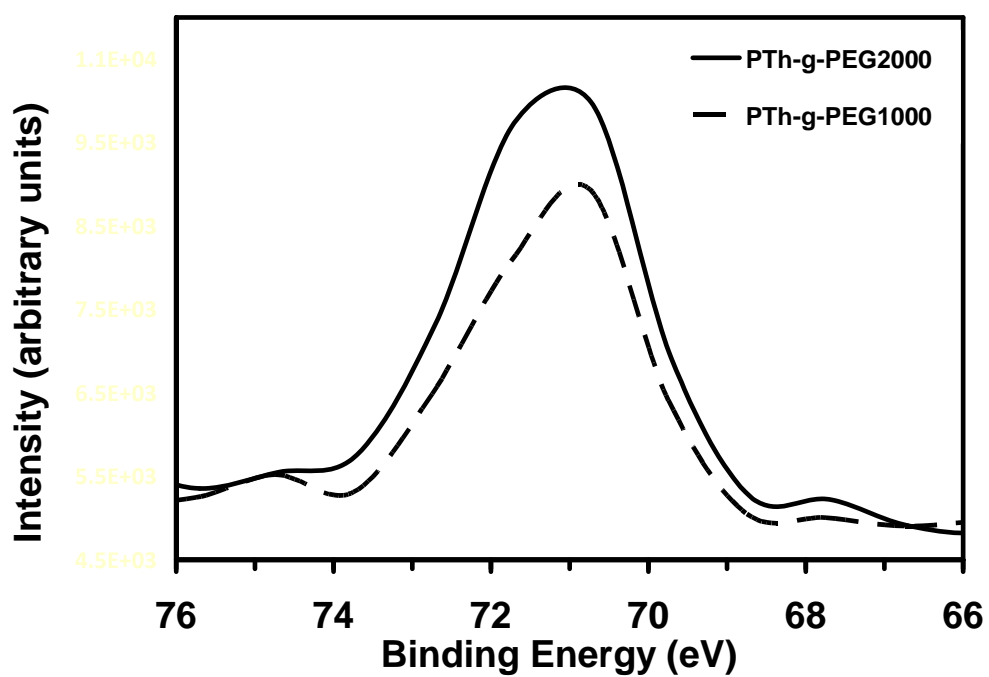

**Figure S2.** XPS spectra in the Br3d region for PTh-g-PEG<sub>1000</sub> and PTh-g-PEG<sub>2000</sub> prepared using LiClO<sub>4</sub> as electrolyte.

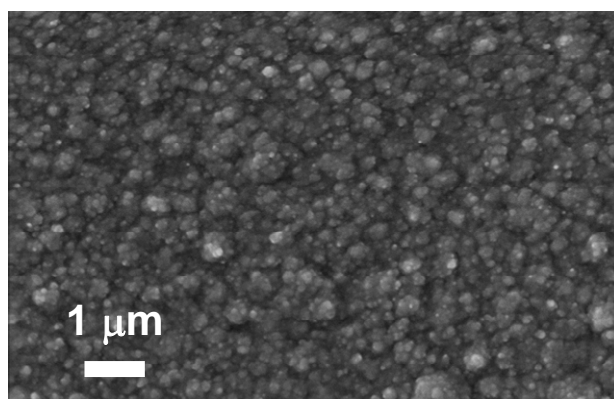

**Figure S3.** SEM micrograph PTh-g-PEG<sub>1000</sub> prepared using 0.1 M LiClO<sub>4</sub> and a fixed potential of 0.75 V.
